# Supplementary material for: SERS-fluorescence bimodal nanoprobes forin vitroimaging of the fatty acid responsive receptor GPR120
Source: Royal Society of Chemistry journal article supplement (doi:10.1039/c7ay02039b), 2017-10-18
Supplement: c7ay02039b1.pdf [file c7ay02039b1.pdf]

## Supporting Information

### **SERS-fluorescence bimodal nanoprobe for in vitro imaging of fatty acid responsive receptor GPR120**

Lifu Xiao<sup>1,3</sup>, Abdul K. Parchur<sup>1</sup>, Timothy A. Gilbertson<sup>2</sup>, Anhong Zhou<sup>1\*</sup>

<sup>1</sup>*Department of Biological Engineering, Utah State University, Logan, Utah 84322-4105, U.S.A*

<sup>2</sup>*Department of Biology, Utah State University, Logan, Utah 84322-5305, U.S.A*

<sup>3</sup>*Department of Chemistry and Biochemistry, University of Notre Dame, Notre Dame, Indiana, 46556, USA*

#### **Content:**

Fig. S1 FT-IR spectra of PEGs and GPR120 antibody.

Fig. S2 Biocompatibility of the SERS-fluorescence bimodal nanoprobe.

Fig. S3 Fluorescence imaging of CD36 and GPR120 (+) cells incubated with nanoprobe.

\*Corresponding author:

Anhong Zhou, Ph.D.

Department of Biological Engineering

Utah State University

4105 Old Main Hill

Logan, UT 84322

U.S.A.

Tel: 1(435)797-2863

Fax: 1(435)797-1248

Email: [Anhong.Zhou@usu.edu](mailto:Anhong.Zhou@usu.edu)

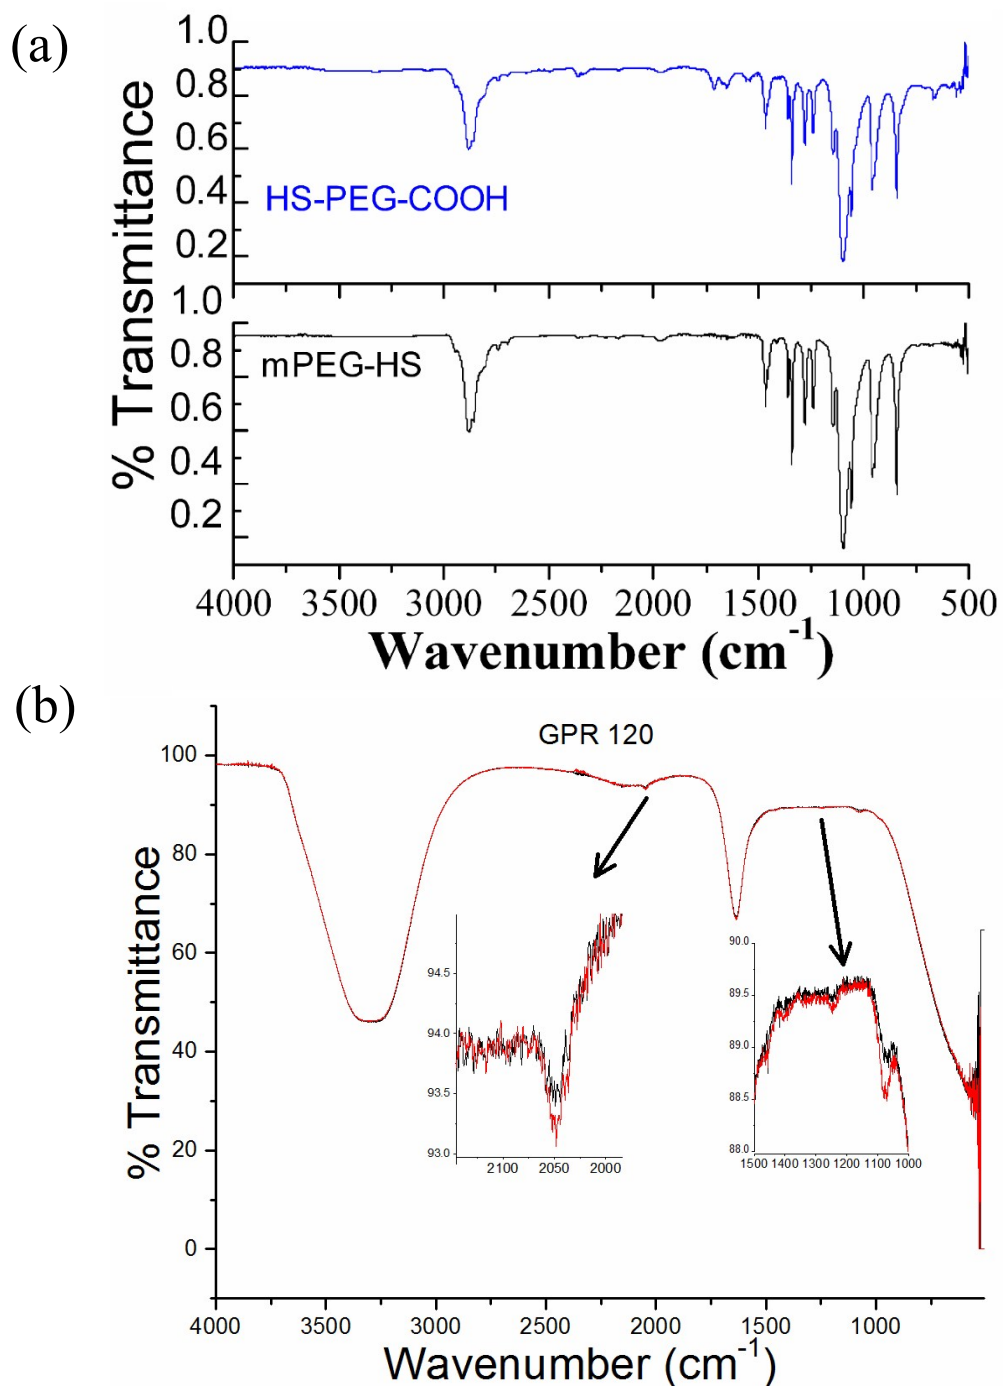

Fig. S1 FT-IR spectra of (a) HS-PEG-COOH, mPEG-HS and (b) GPR120 antibody.

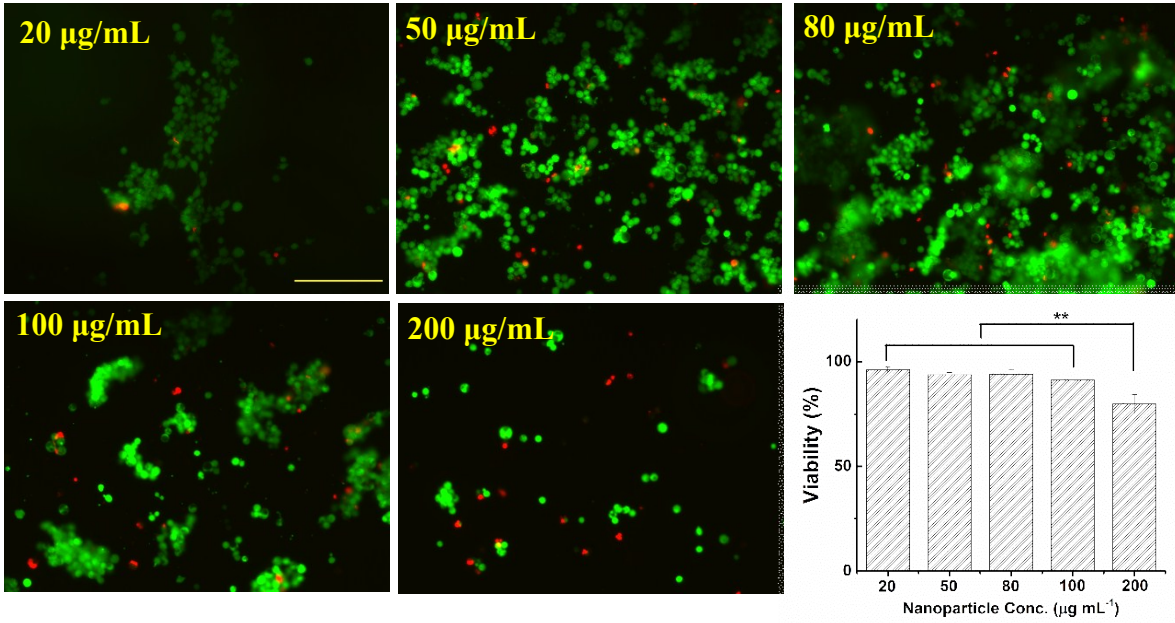

Fig. S2 Viability of GPR120 (+) cells with 24-hr incubation of  $\text{CaMoO}_4:\text{Eu}^{3+}@\text{AuNR-MBA-Ab}$  nanoprobe at concentrations of 20, 50, 80, 100, and 200  $\mu\text{g/mL}$ . Green fluorescence presented live cells, whereas red fluorescence showed dead or membrane-damaged cells. Over 300 cells were counted for each treatment condition. Scale bar: 200  $\mu\text{m}$ . \*\* $P < 0.001$ .

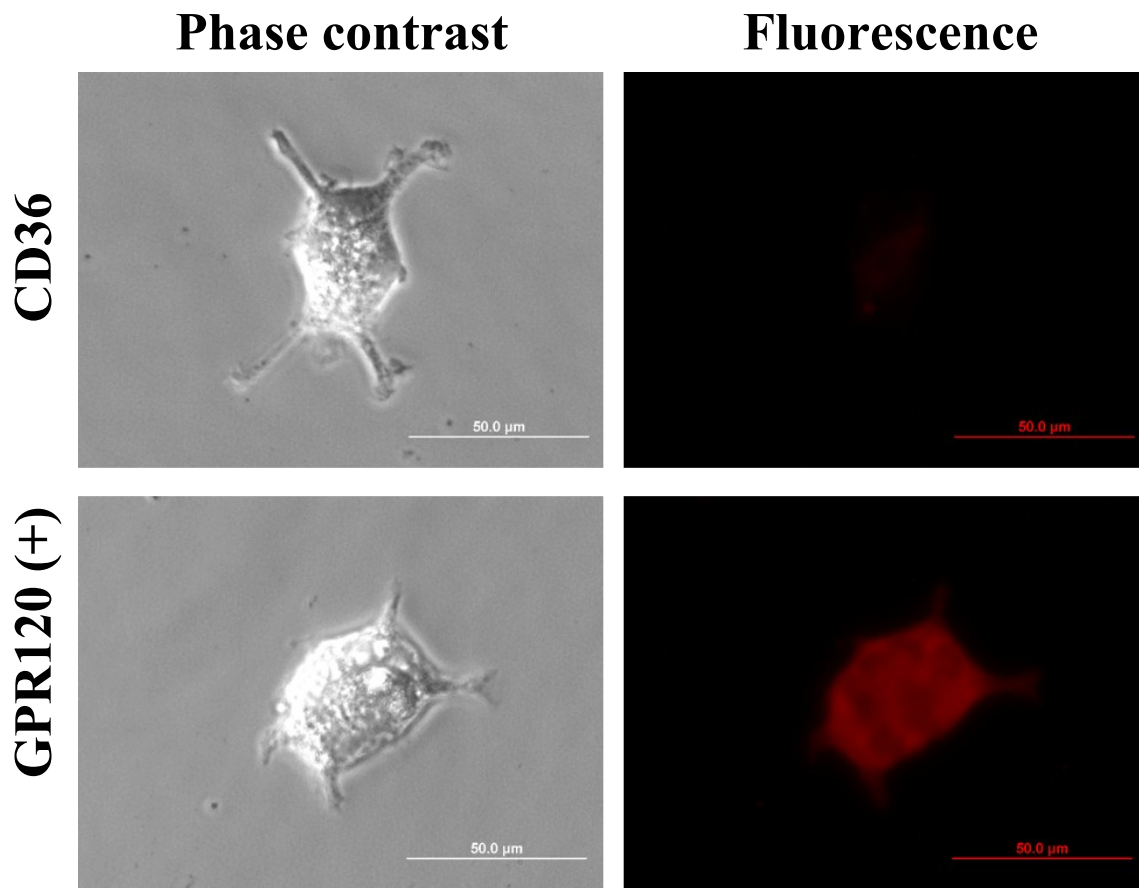

Fig. S3 Phase contrast and corresponding fluorescence images of single CD36 and GPR120 (+) cells incubated with  $\text{CaMoO}_4:\text{Eu}^{3+}@\text{AuNR-MBA-Ab}$  nanoprobe for 24 hr.

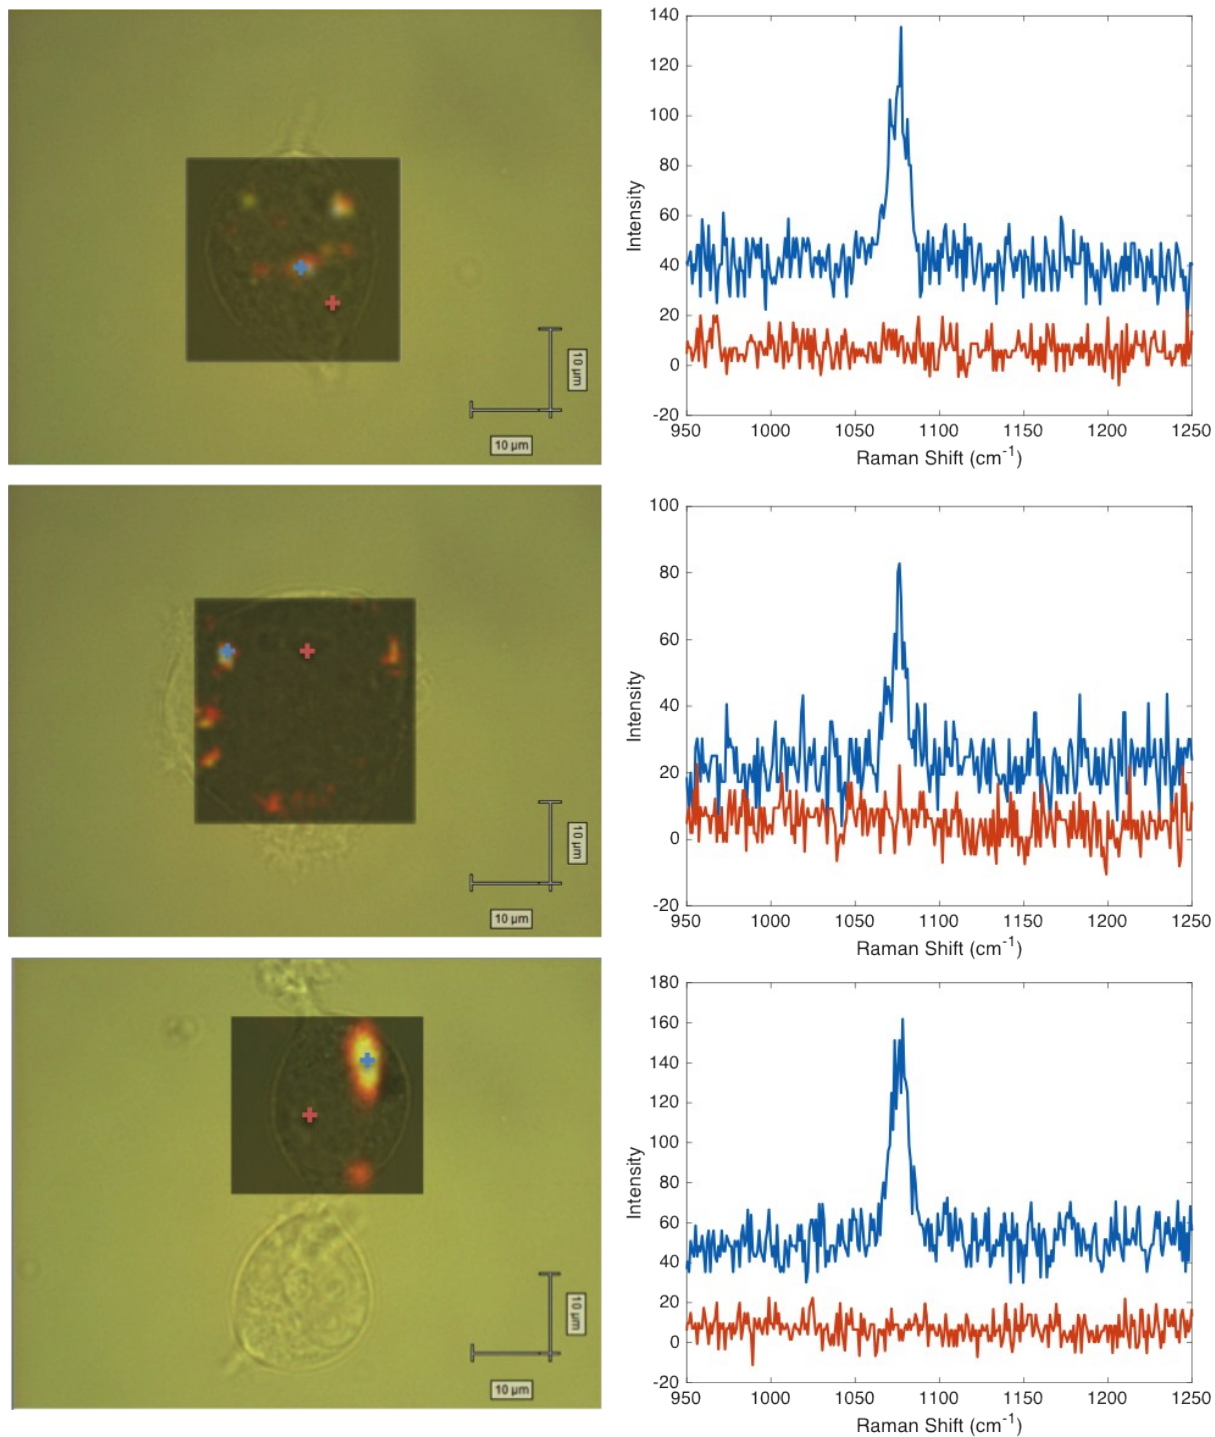

Fig. S4 Additional SERS maps (left) of GPR120 (+) cells incubated with  $\text{CaMoO}_4:\text{Eu}^{3+}@\text{AuNR-MBA-Ab}$  nanoprobe and spectra (right) extracted at blue and red crosses in the corresponding maps. Raman mappings were generated by the selection of peak  $1078 \text{ cm}^{-1}$ .
